# Supplementary material for: Deciphering the Molecular Machinery—Influence of sE-Cadherin on Tumorigenic Traits of Prostate Cancer Cells
Source: MDPI journal article supplement (doi:10.3390/biology10101007), 2021-10-07

Representative scatterplots from flow cytometry analysis

Integrin expression on PC3 cells related to Figure 5A

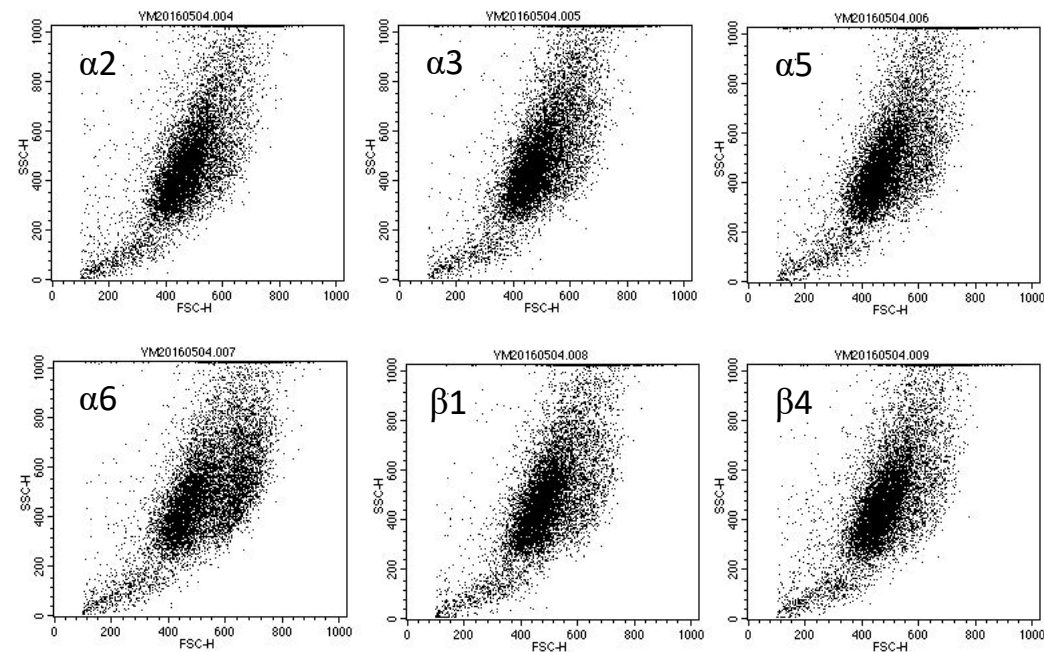

CD44v expression related to Figure 4A

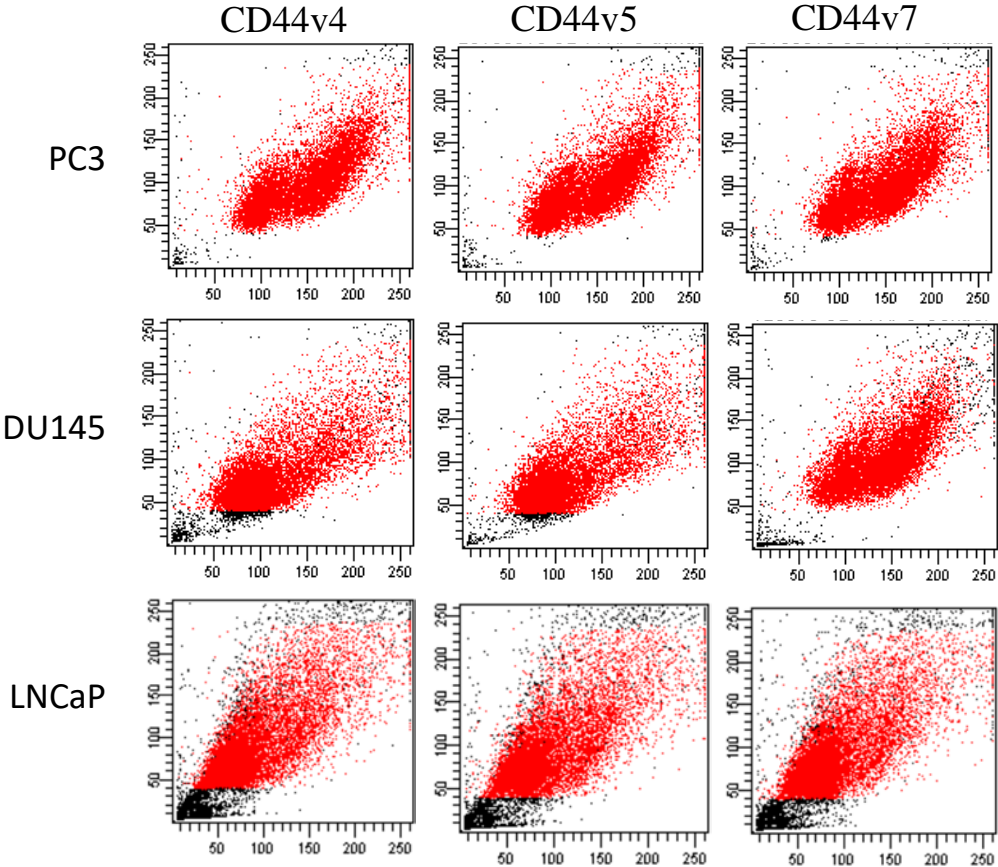

Supplement S2: Protein blots

Figure S5C

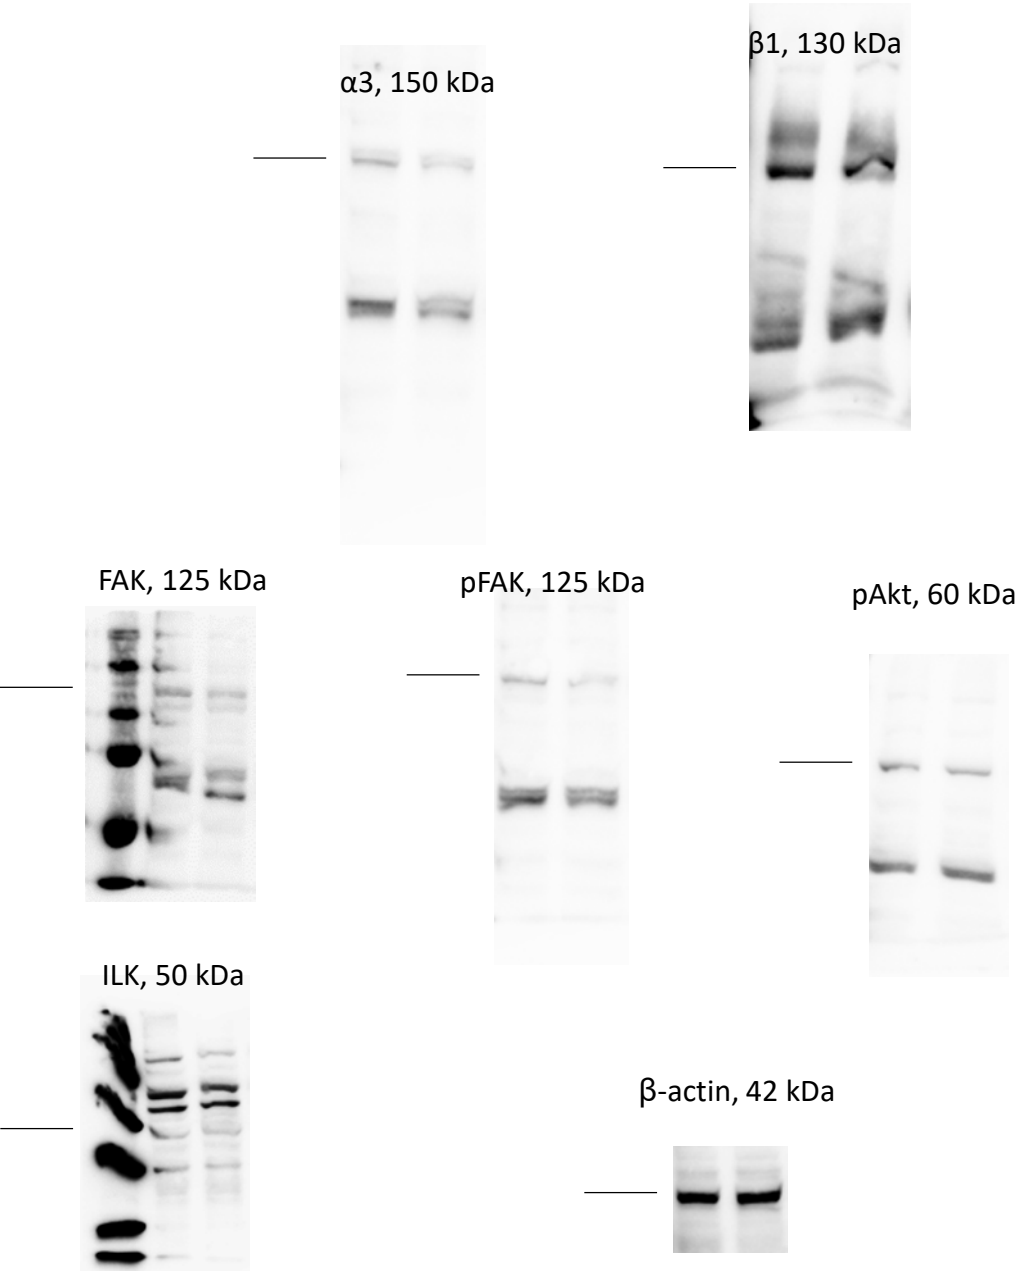

Figure S5F

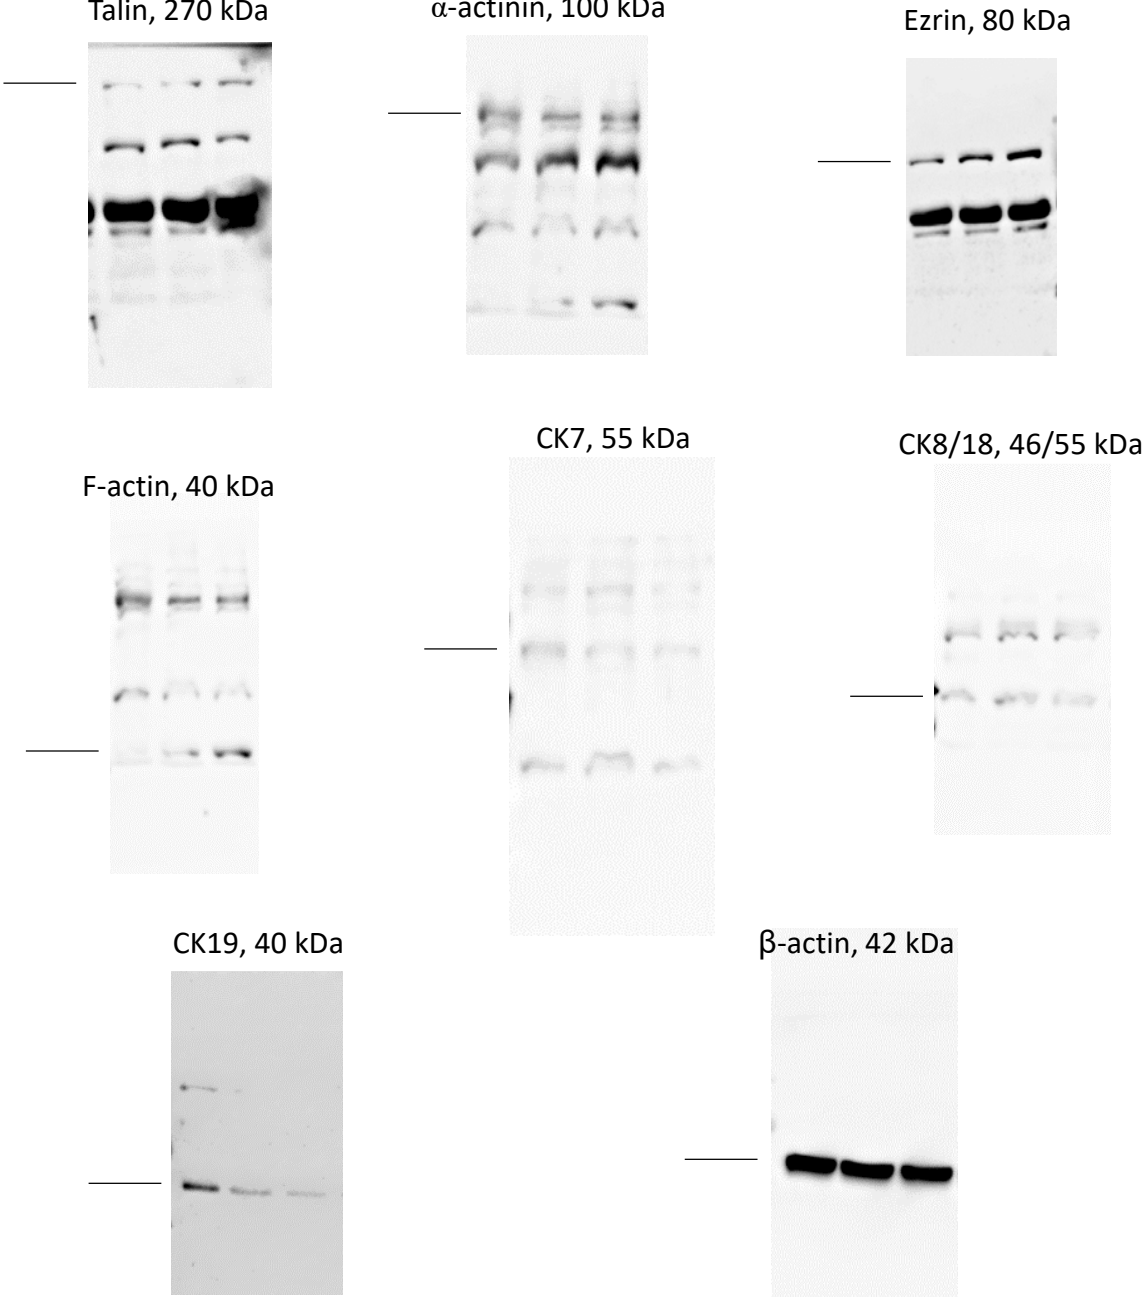

Supplement: s1 [file s1]
